# Supplementary material
Source: PubMed Central journal article supplement (PMC5691338)

# Sup. Fig 1.

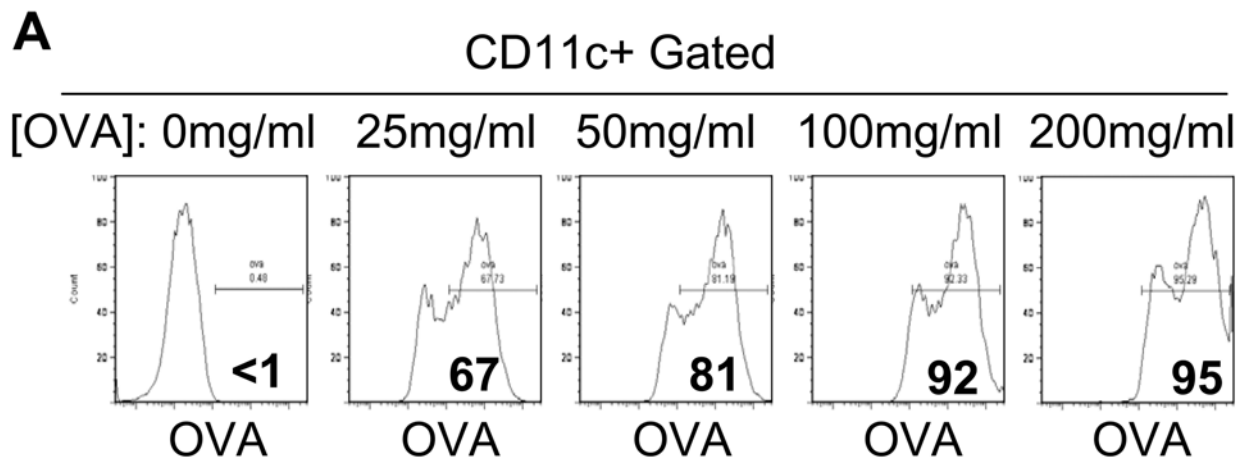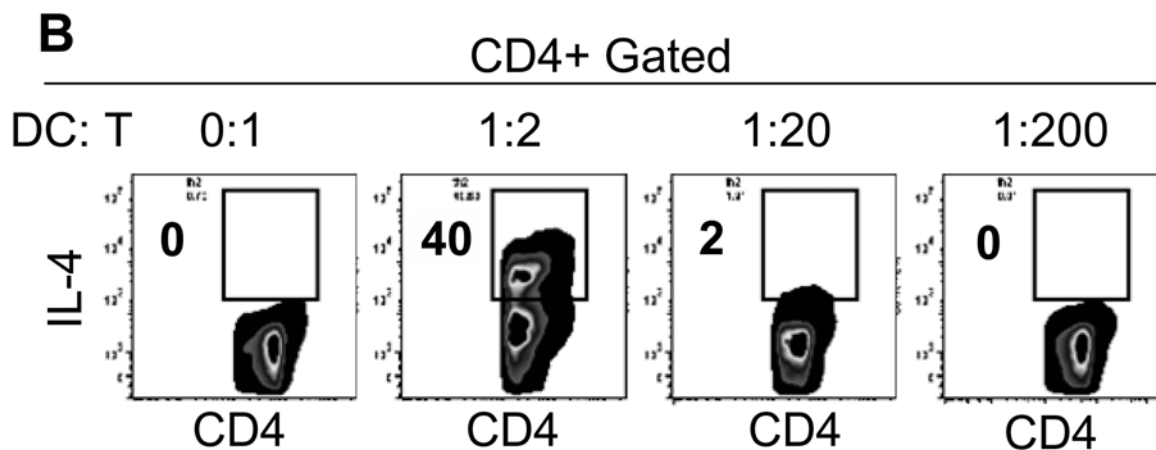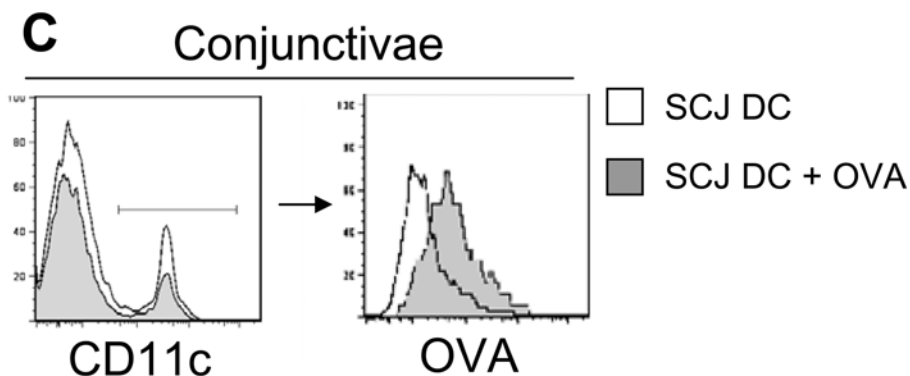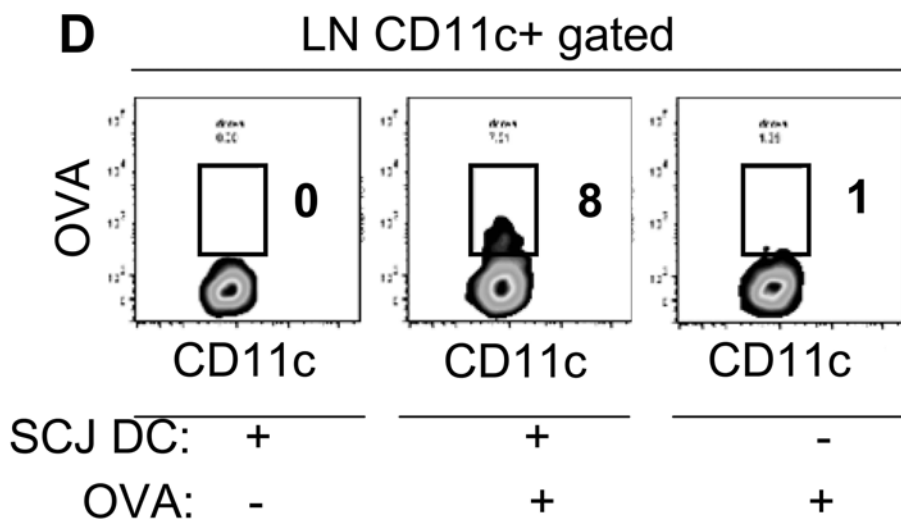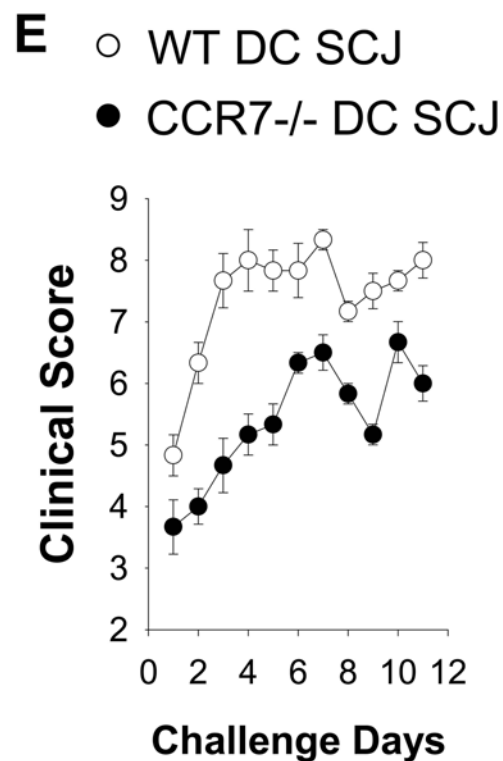

Supplement: mmc1.pdf [file mmc1.pdf]
